# Supplementary material for: Decoding acute myocarditis in patients with COVID-19: Early detection through machine learning and hematological indices
Source: PubMed Central journal article supplement (PMC10831249; doi:10.1016/j.isci.2023.108524), 2023-11-23
Supplement: mmc1.pdf [file mmc1.pdf]

**iScience, Volume 27**

**Supplemental information**

**Decoding acute myocarditis in patients  
with COVID-19: Early detection through machine  
learning and hematological indices**

**Haiyang Li, Zhangkai J. Cheng, Xing Fu, Mingtao Liu, Peng Liu, Wenhan Cao, Zhiman Liang, Fei Wang, and Baoqing Sun**

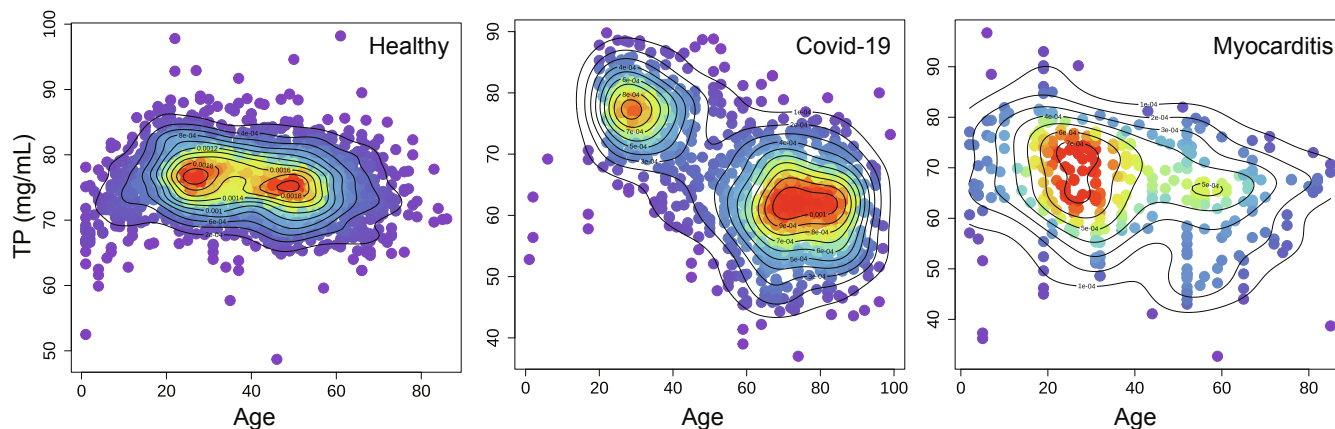

**Supplementary Figure 1** The correlation analysis results of the samples. The groups are the healthy population, COVID-19 patients and myocarditis patients, respectively.

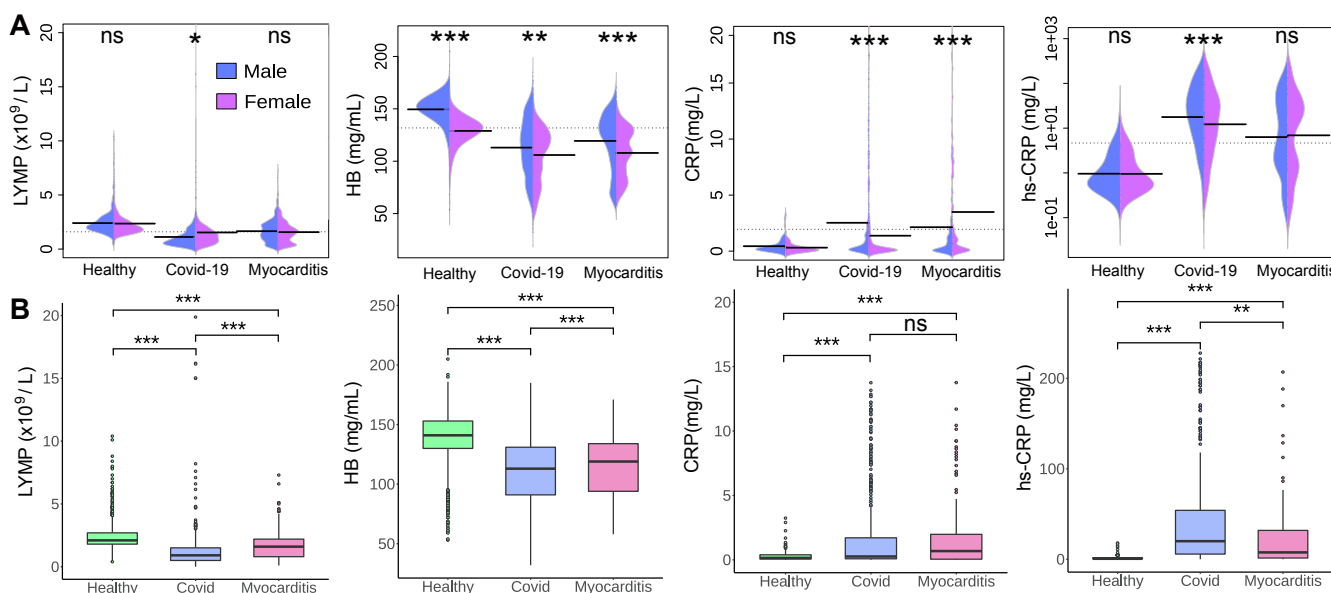

**Supplementary Figure 2** The distribution and group statistical significance analysis results of a single indicator (LYMP, HB, CRP, hs-CRP) in the healthy population, COVID-19, Myocarditis patients groups. **A**) Gender statistical significance distribution. **B**) Group statistical significance distribution. Interquartile range, the mean  $\pm$  SD and t-test, where a statistically significant difference is denoted by \*\*\* ( $p < 0.001$ ), \*\* ( $p < 0.01$ ), and \* ( $p < 0.05$ ), and non-significance ( $p > 0.05$ ) is denoted by "ns".

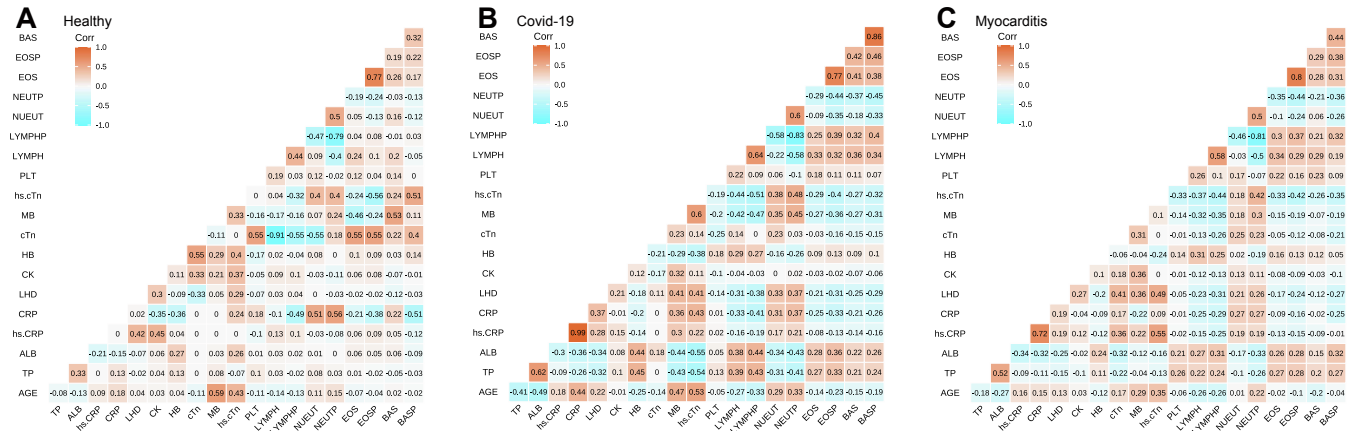

**Supplementary Figure 3** The correlation analysis results of the samples. **A)** Healthy population. **B)** COVID-19 patients. **C)** Myocarditis patients.

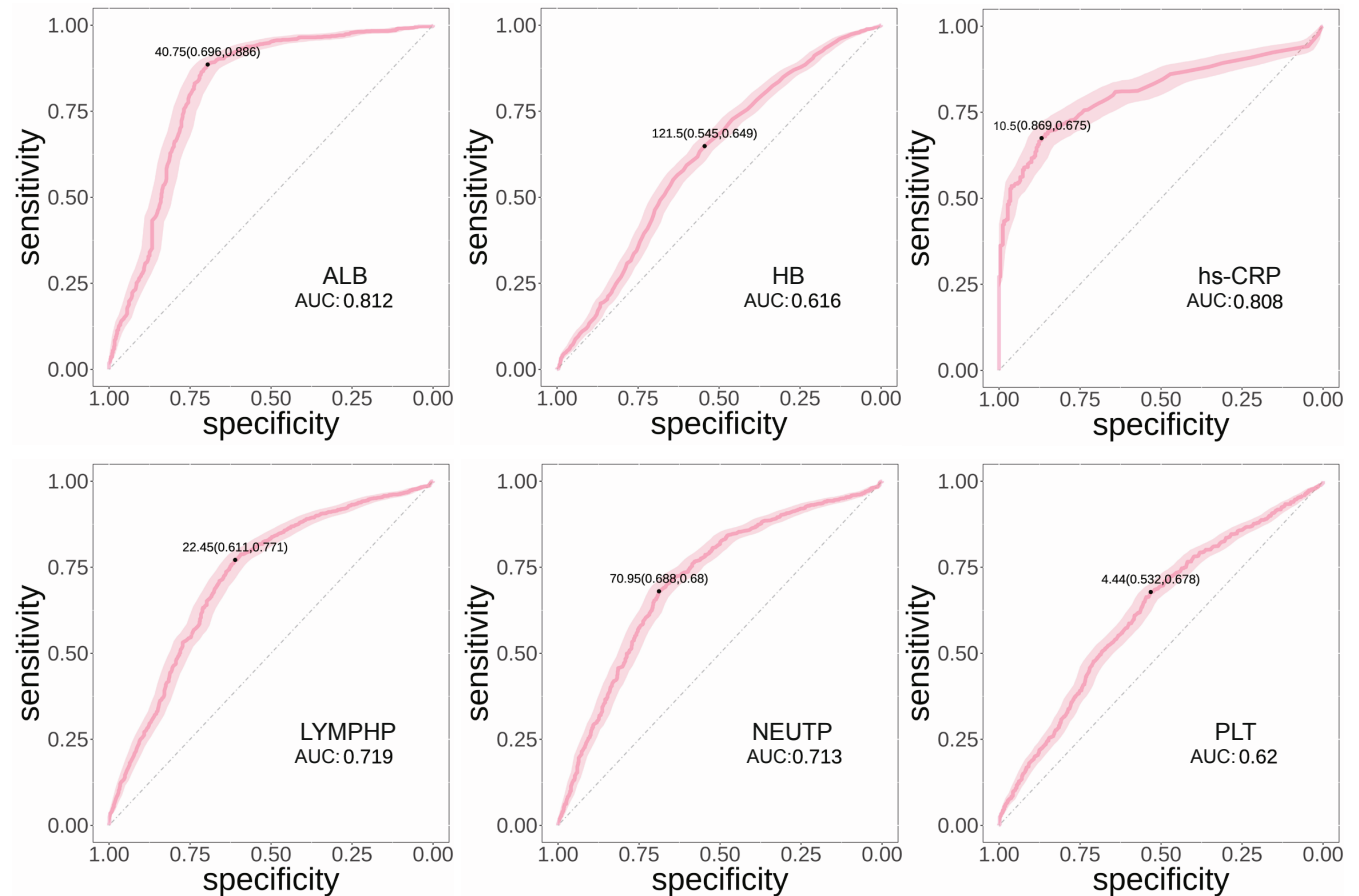

**Supplementary Figure 4** The ROC curve performance of Bayes single index prediction model under different indicators.

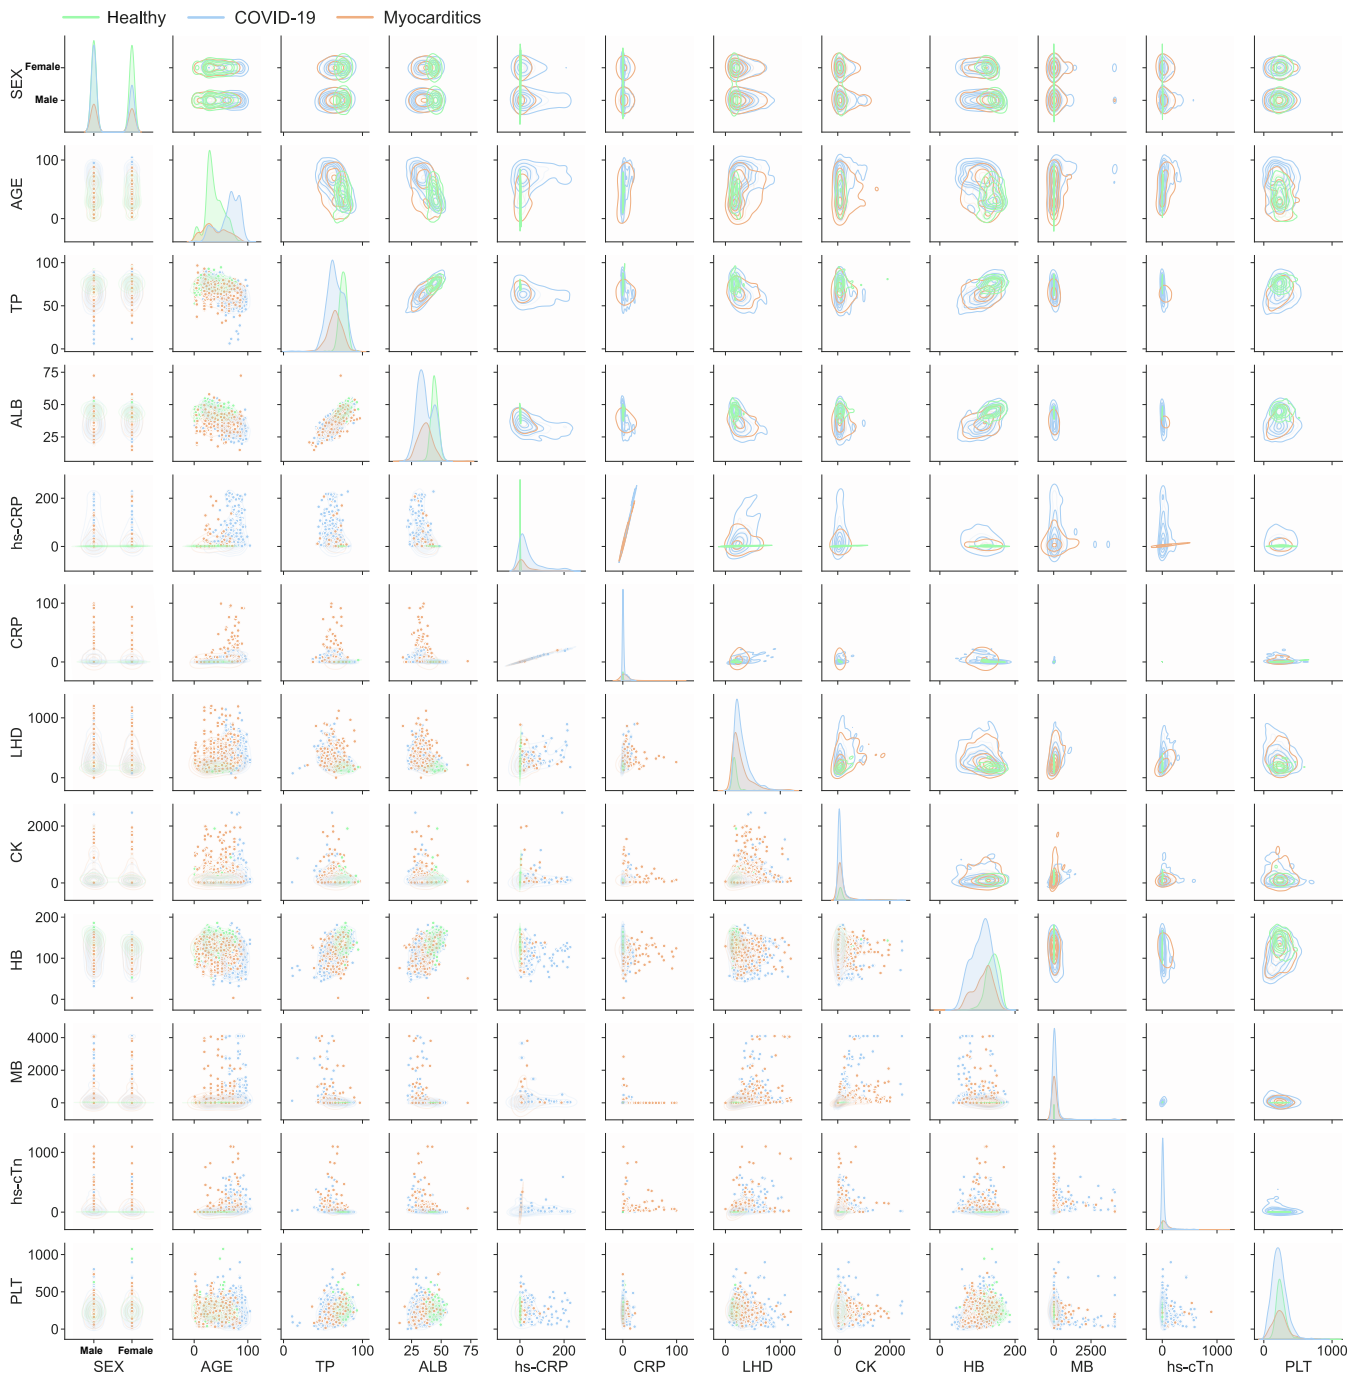

**Supplementary Figure 5 Paired correlation graph between all indicators.** The distribution (lower) and concentrated dispersion (upper) of indicators among each group.

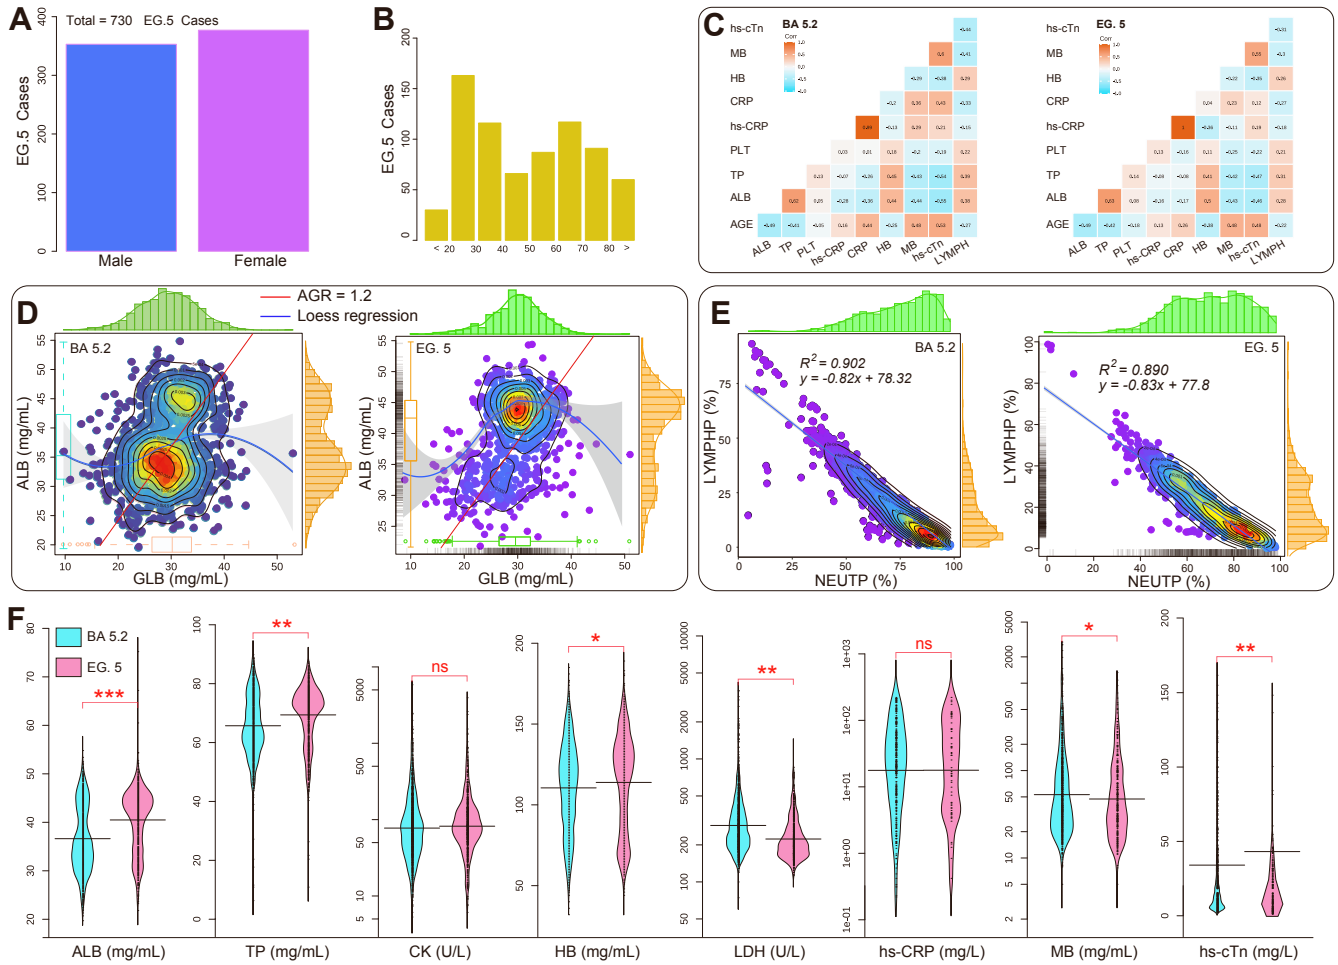

**Supplementary Figure 6 Analysis and comparison of indicators among different COVID-19 variants (BA.5.2 VS EG.5).**

**A)** The gender distribution of EG.5 variant participants. **B)** The age distribution of EG.5 variant participants. **C)** The correlation analysis results of BA. 5.2 and EG.5 variant. **D)** The ALB/GLB distribution of BA. 5.2 and EG.5 variant. **E)** The LYMPHP/NEUTP distribution of BA. 5.2 and EG.5 variant. **F)** The significance analysis of differences among indicators of BA.5.2 and EG.5 variant. Interquartile range, the mean  $\pm$  SD and t-test, where a statistically significant difference is denoted by \*\*\* ( $p < 0.001$ ), \*\* ( $p < 0.01$ ), and \* ( $p < 0.05$ ), and non-significance ( $p > 0.05$ ) is denoted by "ns".

**TABLE S1** The model performance of the single indicator model and the multi-indicator model and the Youden's Index

| <b>Indicator</b>      | <b>AUC</b> | <b>Sensitivity</b> | <b>Specificity</b> | <b>Youden's index</b> |
|-----------------------|------------|--------------------|--------------------|-----------------------|
| CK                    | 0.657      | 0.735              | 0.488              | 0.223                 |
| LDH                   | 0.684      | 0.983              | 0.514              | 0.497                 |
| MB                    | 0.547      | 0.763              | 0.451              | 0.214                 |
| hs-cTn                | 0.796      | 0.763              | 0.732              | 0.495                 |
| ALB                   | 0.812      | 0.696              | 0.886              | 0.582                 |
| HB                    | 0.616      | 0.545              | 0.649              | 0.194                 |
| hs-CRP                | 0.808      | 0.869              | 0.675              | 0.544                 |
| LYMPHP                | 0.719      | 0.611              | 0.711              | 0.322                 |
| NEUTP                 | 0.713      | 0.688              | 0.680              | 0.368                 |
| PLT                   | 0.620      | 0.532              | 0.678              | 0.210                 |
| Myocardial biomarkers | 0.887      | 0.917              | 0.776              | 0.693                 |
| Composite indicator   | 0.924      | 0.905              | 0.851              | 0.756                 |
